# Supplementary material for: Pinhole-free TiO2/Ag(O)/ZnO configuration for flexible perovskite solar cells with ultralow optoelectrical loss
Source: Royal Society of Chemistry journal article supplement (doi:10.1039/c9ra00042a), 2019-01-01
Supplement: c9ra00042a1.pdf [file c9ra00042a1.pdf]

## Electronic Supplementary Information

### Pinhole-free TiO<sub>2</sub>/Ag<sub>(0)</sub>/ZnO Configuration for Flexible Perovskite Solar Cells with Ultralow Optoelectrical Loss

Eunwook Jeong,<sup>‡a,b</sup> Soohyun Bae,<sup>‡c\*</sup> Jong Bae Park,<sup>d</sup> Seung Min Yu,<sup>d</sup> Donghwan Kim,<sup>c</sup> Hae-Seok Lee,<sup>e</sup>  
Jongjoo Rha,<sup>a</sup> Young-Rae Cho<sup>b\*</sup> and Jungheum Yun<sup>a\*</sup>

<sup>a</sup> Surface Technology Division, Korea Institute of Materials Science, Changwon, Gyeongnam 51508, Republic of Korea; Fax: +82-55-280-3570; Tel: +82-55-280-3515; E-mail: jungheum@kims.re.kr,

<sup>b</sup> Department of Materials Science and Engineering, Pusan National University, Busan 46241, Republic of Korea; Tel: +82-51-510-2389; E-mail: yescho@pusan.ac.kr

<sup>c</sup> Department of Materials Science and Engineering, Korea University, Seoul 02841, Republic of Korea; Tel: +82-2-3290-3713; E-mail: ramun16@korea.ac.kr

<sup>d</sup> Jeonju Center, Korea Basic Science Institute, Jeonju, Jeonbuk 54907, Republic of Korea

<sup>e</sup> KU-KIST Green School, Graduate School of Energy and Environment, Korea University, Seoul 02841, Republic of Korea

\*Corresponding authors: E-mail: jungheum@kims.re.kr, ramun16@korea.ac.kr, yescho@pusan.ac.kr

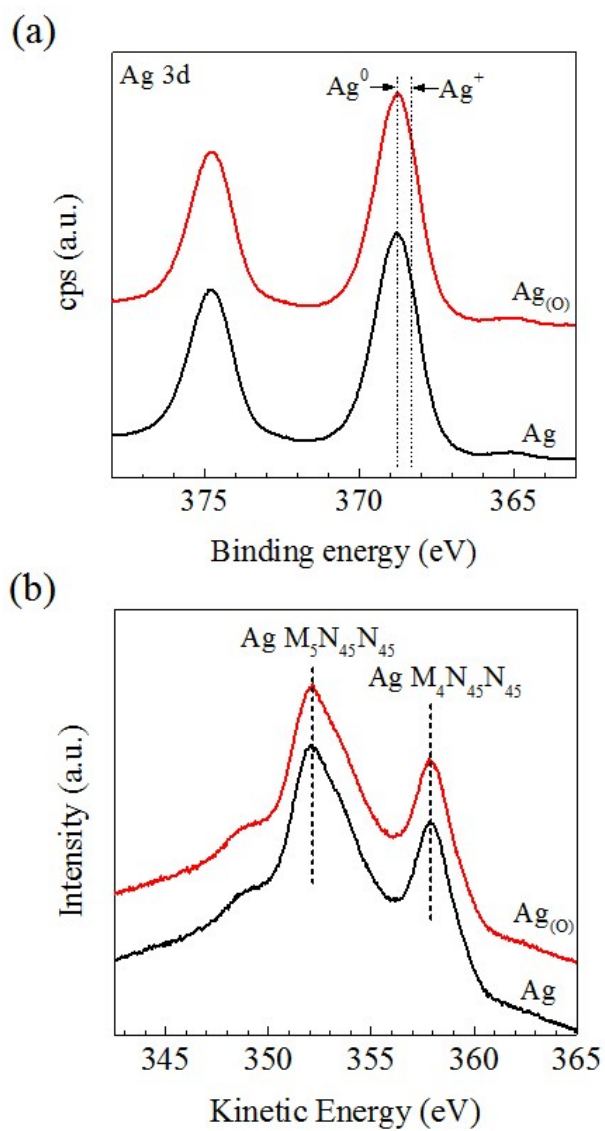

**Fig. S1.** Comparison of the chemical features of Ag and Ag<sub>(O)</sub>. (a) X-ray photoelectron profiles of Ag 3d core level spectra and (b) Ag MNN Auger spectra measured from ca. 20-nm Ag and Ag<sub>(O)</sub> layers deposited on Si wafers.

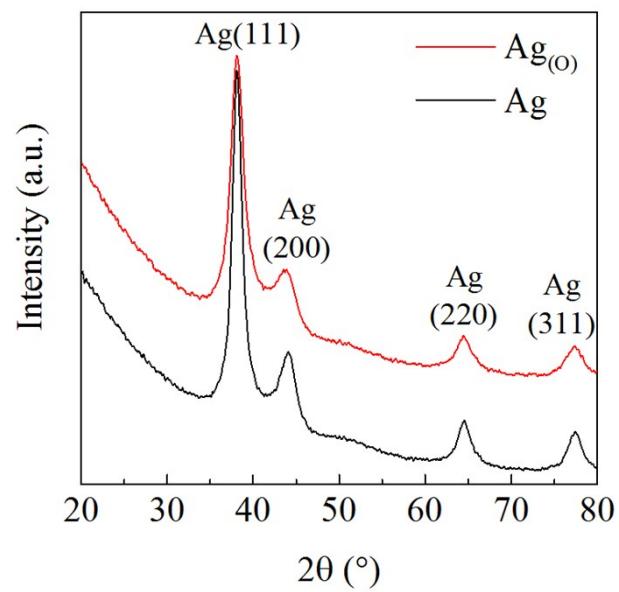

**Fig. S2.** Comparison of the crystallographic features of  $\text{Ag}$  and  $\text{Ag}_{(\text{O})}$ . XRD patterns of  $2\theta$  scan measured for ca. 9-nm  $\text{Ag}$  and  $\text{Ag}_{(\text{O})}$  TEs sandwiched between ca. 15-nm  $\text{SiO}_2$  layers.

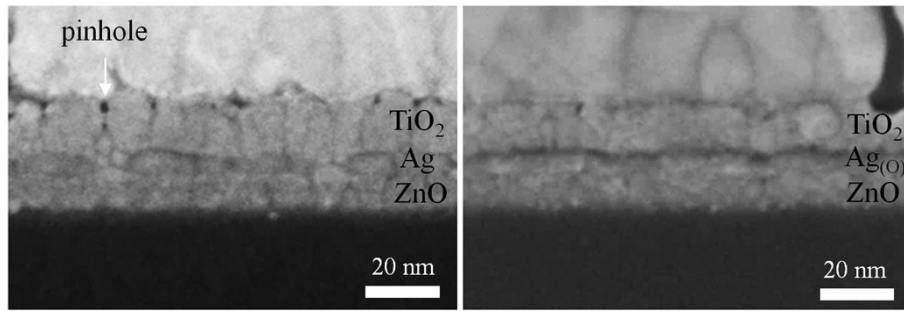

**Fig. S3.** Cross-sectional FE-SEM images of the pinhole distribution in TAZ (left) and TAOZ (right), which are composed of 20-nm top  $\text{TiO}_2$  ETLs, either 7.5-nm Ag or  $\text{Ag}_{(O)}$  TEs, respectively, and 15-nm bottom ZnO layer.

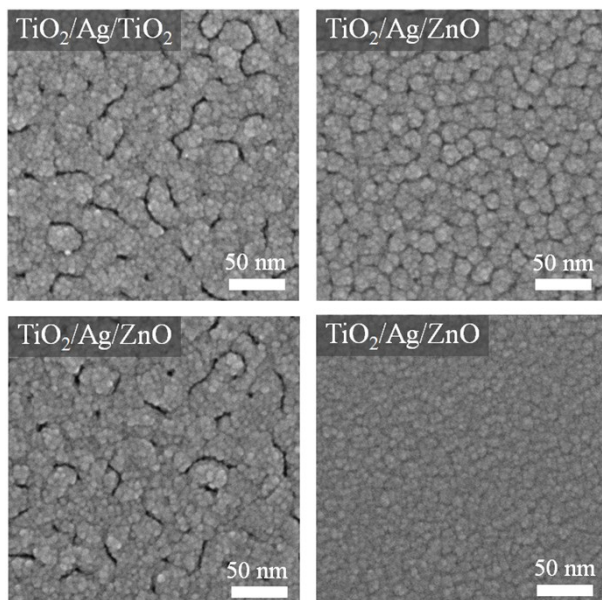

**Fig. S4.** Planar FE-SEM images of 10-nm top TiO<sub>2</sub> ETLs in different OMO configurations: TiO<sub>2</sub>/Ag/TiO<sub>2</sub> (TAT), TiO<sub>2</sub>/Ag/ZnO (TAZ), TiO<sub>2</sub>/Ag<sub>(O)</sub>/TiO<sub>2</sub> (TAOT), and TiO<sub>2</sub>/Ag<sub>(O)</sub>/ZnO (TAOZ) using 7.5-nm Ag and Ag<sub>(O)</sub> TEs and 5-nm bottom oxides.

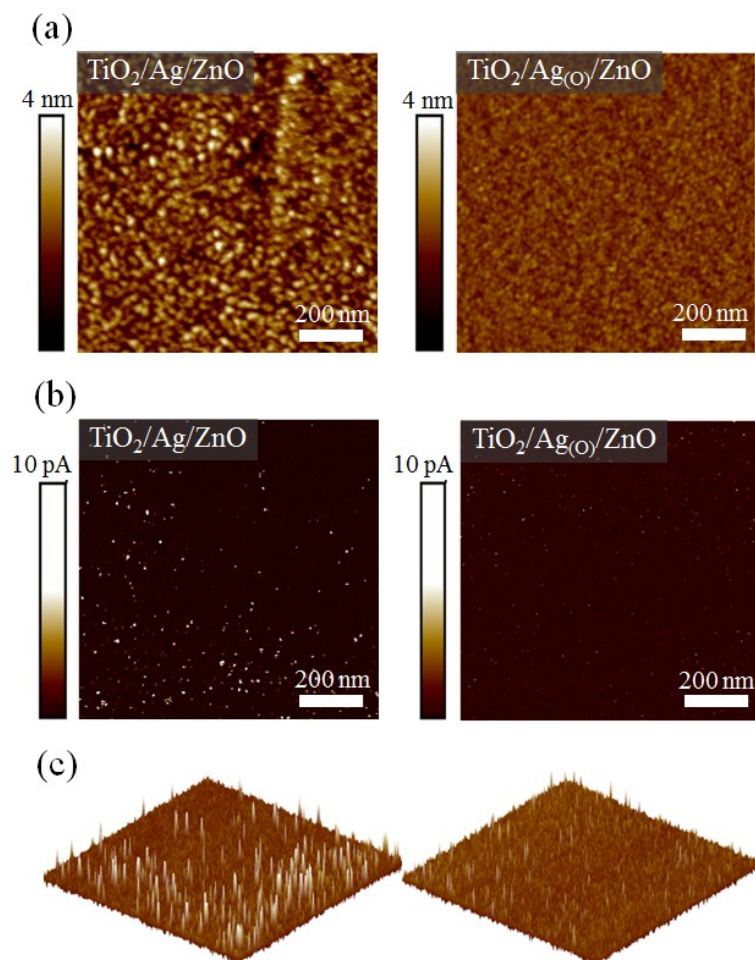

**Fig. S5.** Current leakage distribution through nanoscopic pinholes in 10-nm top TiO<sub>2</sub> ETLs. (a) 2D morphological scan images of 10-nm top TiO<sub>2</sub> ETLs of TiO<sub>2</sub>/7.5-nm Ag/5-nm ZnO (TAZ) and TiO<sub>2</sub>/7.5-nm Ag<sub>(O)</sub>/5-nm ZnO (TAOZ) determined using tapping-mode AFM. (b) 2D and (c) 3D current scan images of the ETLs determined using conductive-mode AFM.

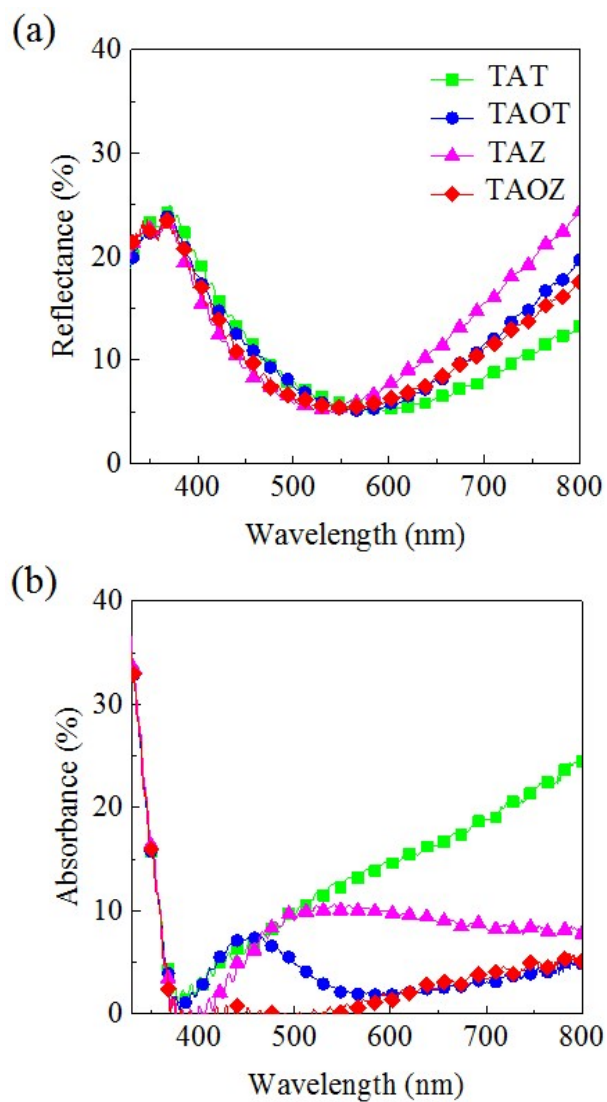

**Fig. S6.** Optical characteristics of OMOs. (a) Reflection and (b) absorbance spectra of TAT, TAOT, TAZ, and TAOZ using 7.5-nm Ag or Ag<sub>(0)</sub> TEs, corresponding to the conditions given in Fig. 5b. The absorbance spectra were determined by the formula absorbance = 100 – (transmittance + reflectance).

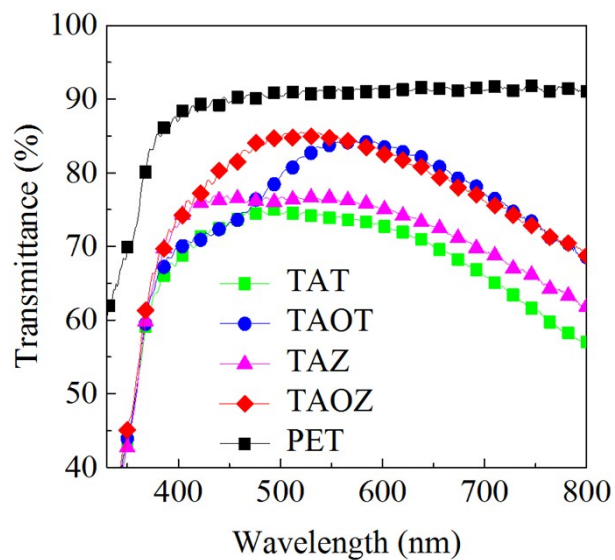

**Fig. S7.** Transmittance spectra of PET and OMOs using 7.5-nm Ag or Ag<sub>(0)</sub> TEs, corresponding to the conditions given in Fig. 5b. The transmittance spectra of OMOs include the transmittance loss due to their PET substrates.



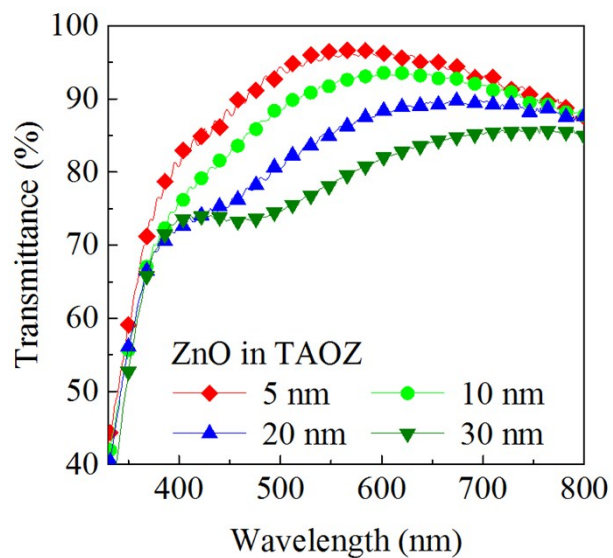

**Fig. S8.** Transmittance spectra of 20-nm  $\text{TiO}_2/7.5\text{-nm Ag}_{(0)}/\text{ZnO}$  (TAOZ) with bottom ZnO layers of various thicknesses. The transmittance of the PET substrates was subtracted from the transmittance spectra of the TAOZ configuration.

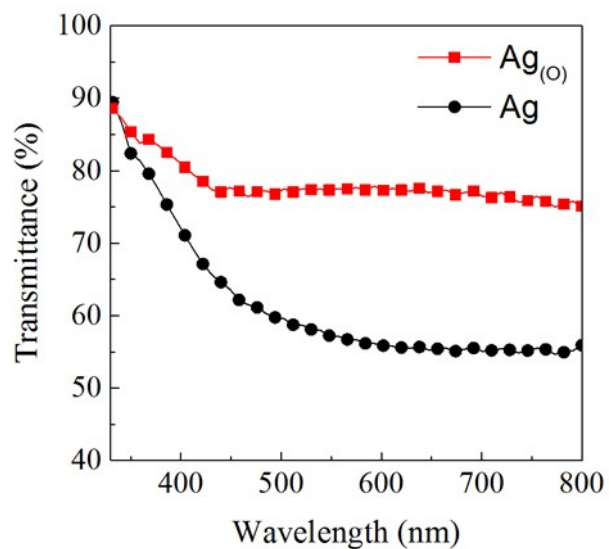

**Fig. S9.** Transmittance spectra of 7.5-nm Ag and  $Ag_{(O)}$  layers deposited on PET substrates without oxides. The transmittance of the PET substrates was subtracted from the transmittance spectra of the Ag and  $Ag_{(O)}$  single films.
